# Supplementary material
Source: PubMed Central journal article supplement (PMC7791529)
Supplement: ajtr0012-7737-f9.pdf [file ajtr0012-7737-f9.pdf]

## Effect of CD36 on vascular repair

**Supplementary Table 1.** Mouse-specific primers for endothelial and angiogenic marker genes for qRT-PCR

| Gene            | Primer (5'→3')         |
|-----------------|------------------------|
| CD36 F          | ATGGGCTGTGATCGGAACTG   |
| CD36 R          | GTCTTCCAATAAGCATGTCTCC |
| CD36 Ex4 F      | AACACTGTGATTGTACCTG    |
| CD36 Ex4 R      | TCAATAAGCATGTCTCCGAC   |
| MMP9 F          | CTGTCCGGCTGTGGTTCAGT   |
| MMP9 R          | AGACGACATAGACGGCATCC   |
| MMP2 F          | GGGGTCCATTTTCTTCTCA    |
| MMP2 R          | CCAGCAAGTAGATGCTGCCT   |
| VEGF $\alpha$ F | AATGCTTTCTCCGCTCTGAA   |
| VEGF $\alpha$ R | GCTTCCTACAGCACAGCAGA   |
| VEGFR2 F        | TCCAGAATCCTCTTCCATGC   |
| VEGFR2 R        | AAACCTCCTGCAAGCAAATG   |
| VEGF $\beta$ F  | GTGAAGCAGGGCCATAAAAG   |
| VEGF $\beta$ R  | GAGCTCAACCCAGACACCTG   |
| VEGFR1 F        | AAGAGAGTCTGGCCTGCTTG   |
| VEGFR1 R        | CTGCTCGGGTGTCTGCTT     |
| eNOS F          | CCTAGGGGAGCTGTTGTACG   |
| eNOS R          | GACCAGCACATTTGGCAAT    |
| CD31 F          | CTTTTCGAGGTGGTGCTGAT   |
| CD31 R          | CCTCCAGGCTGAGGAAAAC    |
| Ki67 F          | CTGCCTGCGAAGAGAGCATC   |
| Ki67 R          | AGCTCCACTTCGCCTTTTGG   |
| TIMP1 F         | AGGTGGTCTCGTTGATTCGT   |
| TIMP1 R         | GTAAGGCCTGTAGCTGTGCC   |
| TIMP2 F         | GAATCCTCTTGATGGGGTTG   |
| TIMP2 R         | CGTTTTGCAATGCAGACGTA   |
| TIMP3 F         | TAGACCAGAGTGCCAAAGGG   |
| TIMP3 R         | CCAGGATGCCTTCTGCAAC    |
| TIMP4 F         | GGGCTCAATGTAGTTGCACA   |
| TIMP4 R         | AGAAACCAACAGTCACAAGCA  |
| AMPK $\alpha$ F | ACAGGCCATAAAGTGGCAGTT  |
| AMPK $\alpha$ R | AAAAGTCTGTCGGAGTGCTGA  |
| ATGL F          | CGCCTTGCTGAGAATCACCAT  |
| ATGL R          | AGTGAGTGGCTGGTAAAAGGT  |
| FASN F          | TTGCTGGCACTACAGAATGC   |
| FASN R          | AACAGCCTCAGAGCGACAAT   |
| Cpt1a F         | CATGTCAAGCCAGACGAAGA   |
| Cpt1a R         | TGGTAGGAGAGCAGCACCTT   |
| Cpt1b F         | GTCGCTTCTCAAGGTCTGG    |
| Cpt1b R         | GGTCTCATCGTCAGGGTTGT   |
| GLUT1 F         | GCTGTGCTTATGGGCTTCTC   |
| GLUT1 R         | CACATACATGGGCACAAAGC   |
| GLUT4 F         | ACTCTTGCCACACAGGCTCT   |
| GLUT4 R         | CCTTGCCCTGTCAGGTATGT   |
| PLIN2 F         | CTACGACGACACCGAT       |
| PLIN2 R         | CATTGCGGAATACGGAG      |

## Effect of CD36 on vascular repair

|        |                      |
|--------|----------------------|
| RPS3 F | AGCTTCCCAGACACCACAAC |
| RPS3 R | ACAAACTCCTTGAGGGCTT  |
| 18S F  | GTAACCCGTTGAACCCATT  |
| 18S R  | CCATCCAATCGGTAGTAGCG |

---

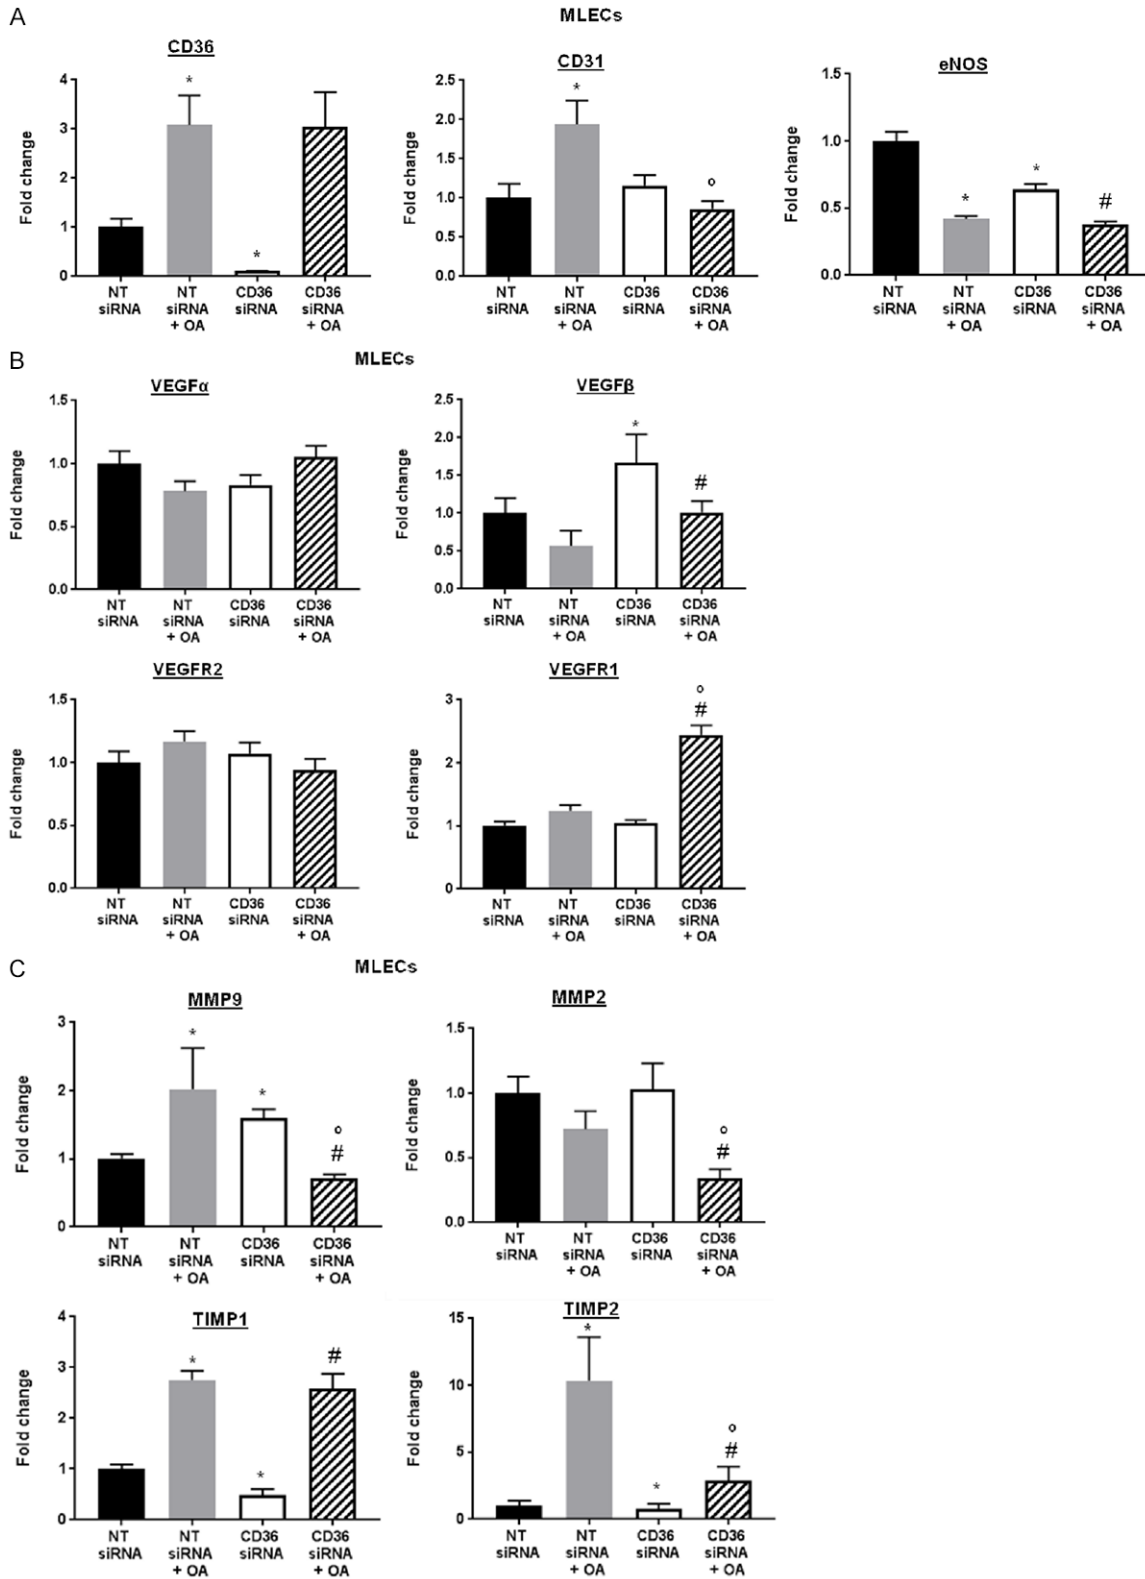

## Effect of CD36 on vascular repair

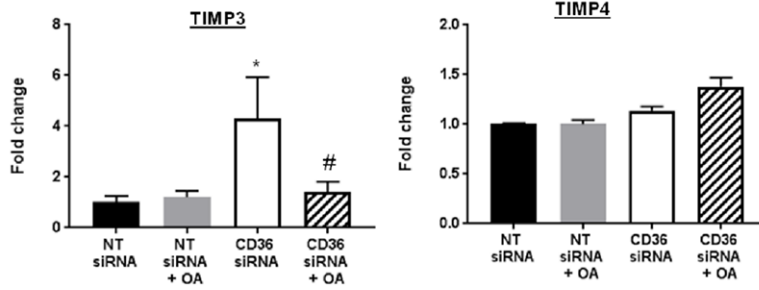

**Supplementary Figure 1.** Effect of oleic acid on gene expression of endothelial and angiogenic markers in CD36-deficient MLECs. Effect of oleic acid (OA, 300  $\mu$ mol/L) and siRNA-mediated CD36 knockdown on MLEC endothelial and angiogenic marker mRNA expression: (A) CD36, CD31, eNOS (B) VEGF $\alpha$ , VEGFR2, VEGF $\beta$ , VEGFR1 and (C) MMP9, MMP2, TIMP1, TIMP2, TIMP3, TIMP4 assessed by quantitative realtime PCR (qRT-PCR) normalized to 18S mRNA expression. Histograms show fold change in mRNA expression compared to NT siRNA ECs. Data represent mean  $\pm$  SEM, n=6, \*p < 0.05 vs. NT siRNA, °p < 0.05 vs. NT siRNA + OA, #p < 0.05 vs. CD36 siRNA. Two-way ANOVA statistical tests were used to determine statistical significance.

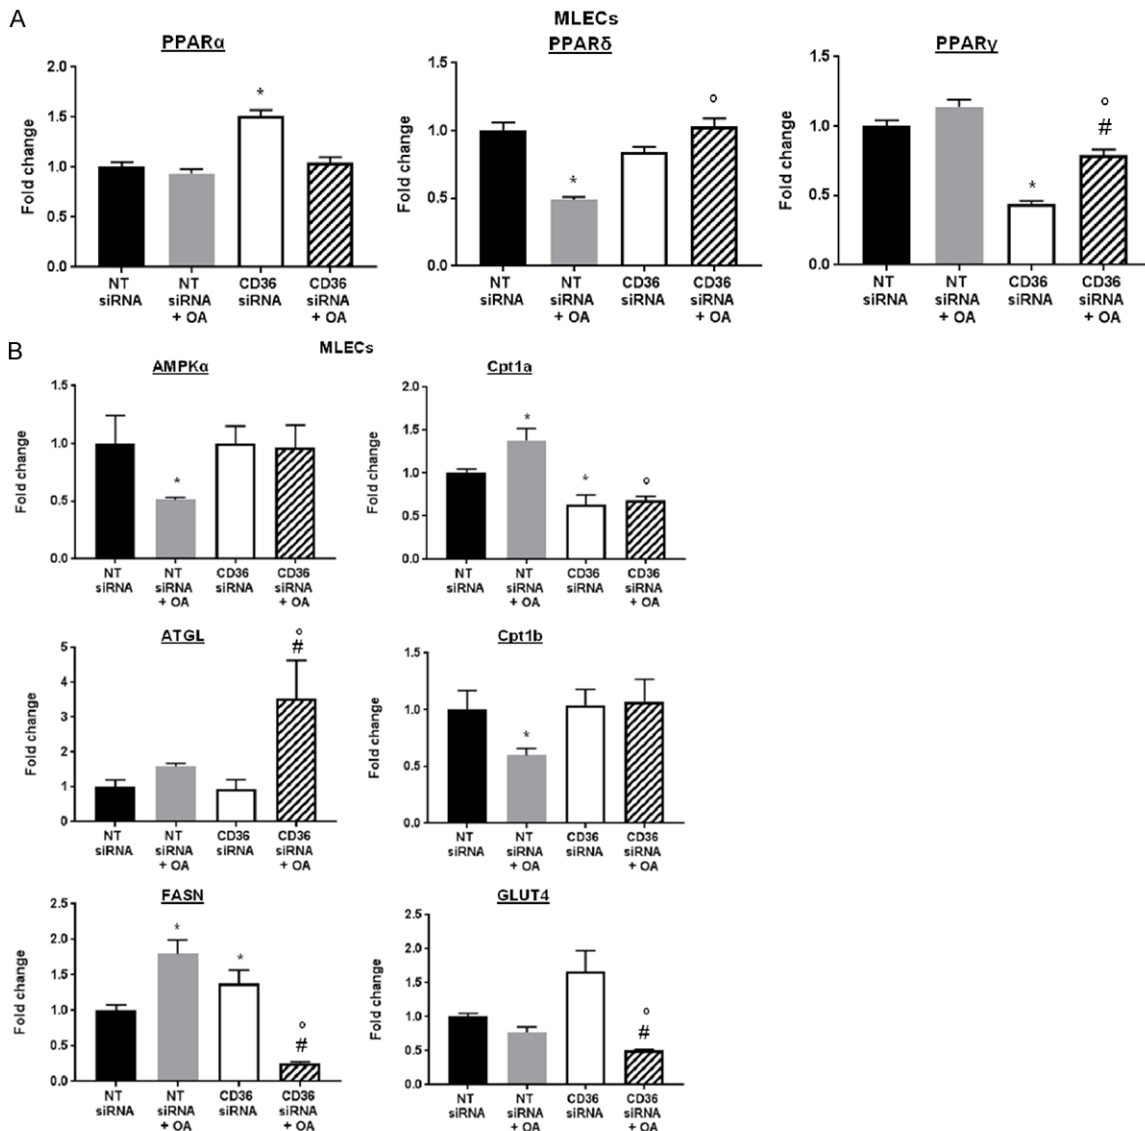

## Effect of CD36 on vascular repair

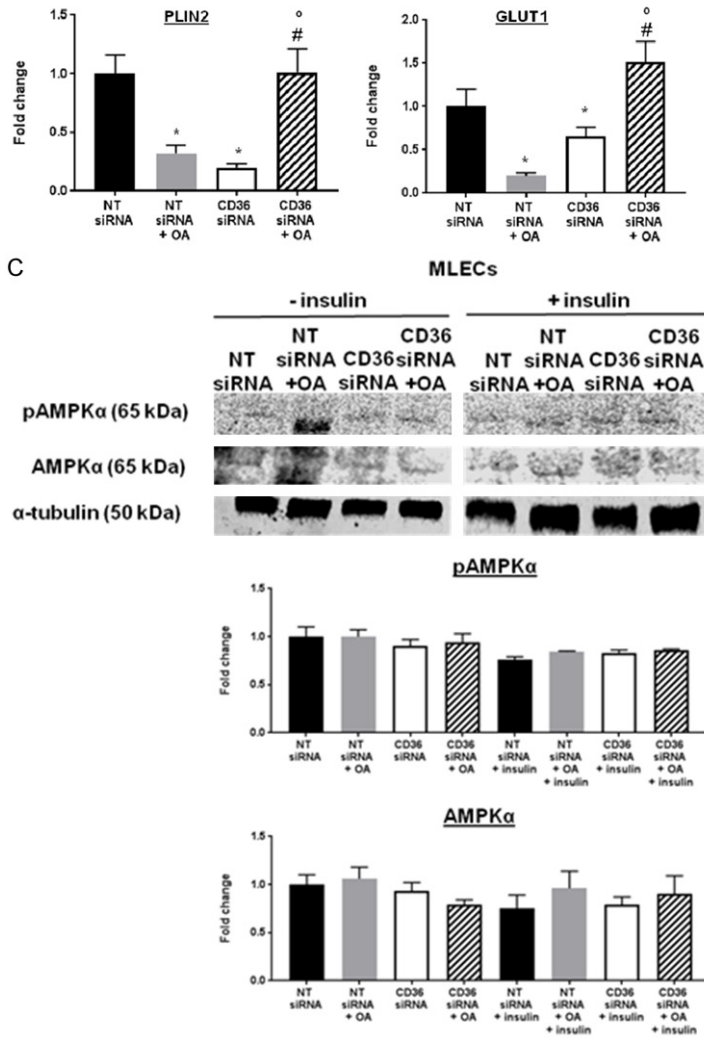

**Supplementary Figure 2.** Effect of oleic acid on gene expression of metabolic markers and protein expression of AMPK in CD36-deficient MLECs. Effect of oleic acid (OA, 300  $\mu$ mol/L) and siRNA-mediated CD36 knockdown on MLEC metabolic gene mRNA expression: (A) PPAR $\alpha$ , PPAR $\delta$ , PPAR $\gamma$  (B) AMPK $\alpha$ , ATGL, FASN, PLIN2, Cpt1a, Cpt1b, GLUT4, and GLUT1. Histograms show fold change in mRNA expression compared to NT siRNA ECs. Data represent mean  $\pm$  SEM, n=5, \*p < 0.05 vs. NT siRNA, <sup>o</sup>p < 0.05 vs. NT siRNA + OA, #p < 0.05 vs. CD36 siRNA; (C) Effect of oleic acid (OA, 300  $\mu$ mol/L) and insulin (50 units/mL) and siRNA-mediated CD36 knockdown on MLEC intracellular signaling proteins as assessed by western blot. Images of SDS-PAGE gels represent protein expression of phospho-AMPK, AMPK and housekeeping gene  $\alpha$ -tubulin. Histograms show fold change in protein expression compared to NT siRNA ECs. Data represent mean  $\pm$  SEM, n=3. Two-way ANOVA statistical tests were used to determine statistical significance.

## Effect of CD36 on vascular repair

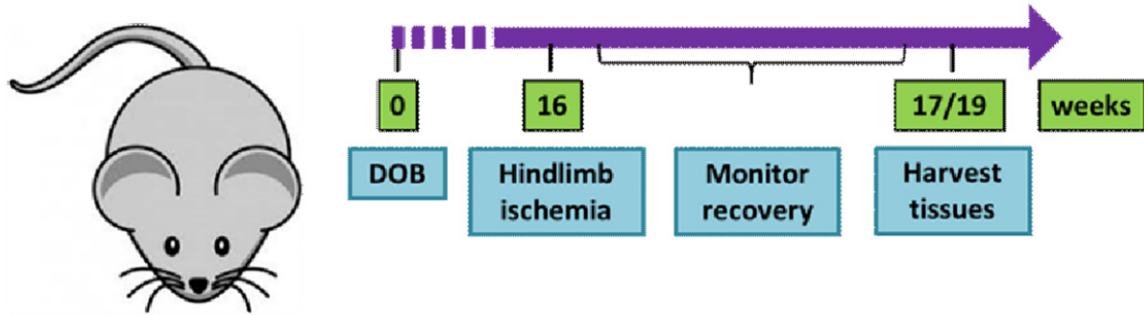

- **EC-CD36 KO mice (EC-*Cd36*<sup>-/-</sup>): C57BL/6J-*CD36*<sup>fl/fl</sup>/Tie2-cre**
- **LoxP control mice (EC-*Cd36*<sup>fl/fl</sup>): C57BL/6J-*CD36*<sup>fl/fl</sup>**
- **Hindlimb ischemia (HLI): ligation of femoral artery**
- **Recovery monitored over 7 and 21 days**

**Supplementary Figure 3.** *In vivo* hindlimb ischemia (HLI) mouse model of peripheral vascular disease (A) Figure shows the timeline of surgery and recovery of LoxP control mice (EC-*Cd36*<sup>fl/fl</sup>) and EC-CD36 KO mice (EC-*Cd36*<sup>-/-</sup>) whereby recovery was monitored over 7 and 21 days.

Effect of CD36 on vascular repair

A

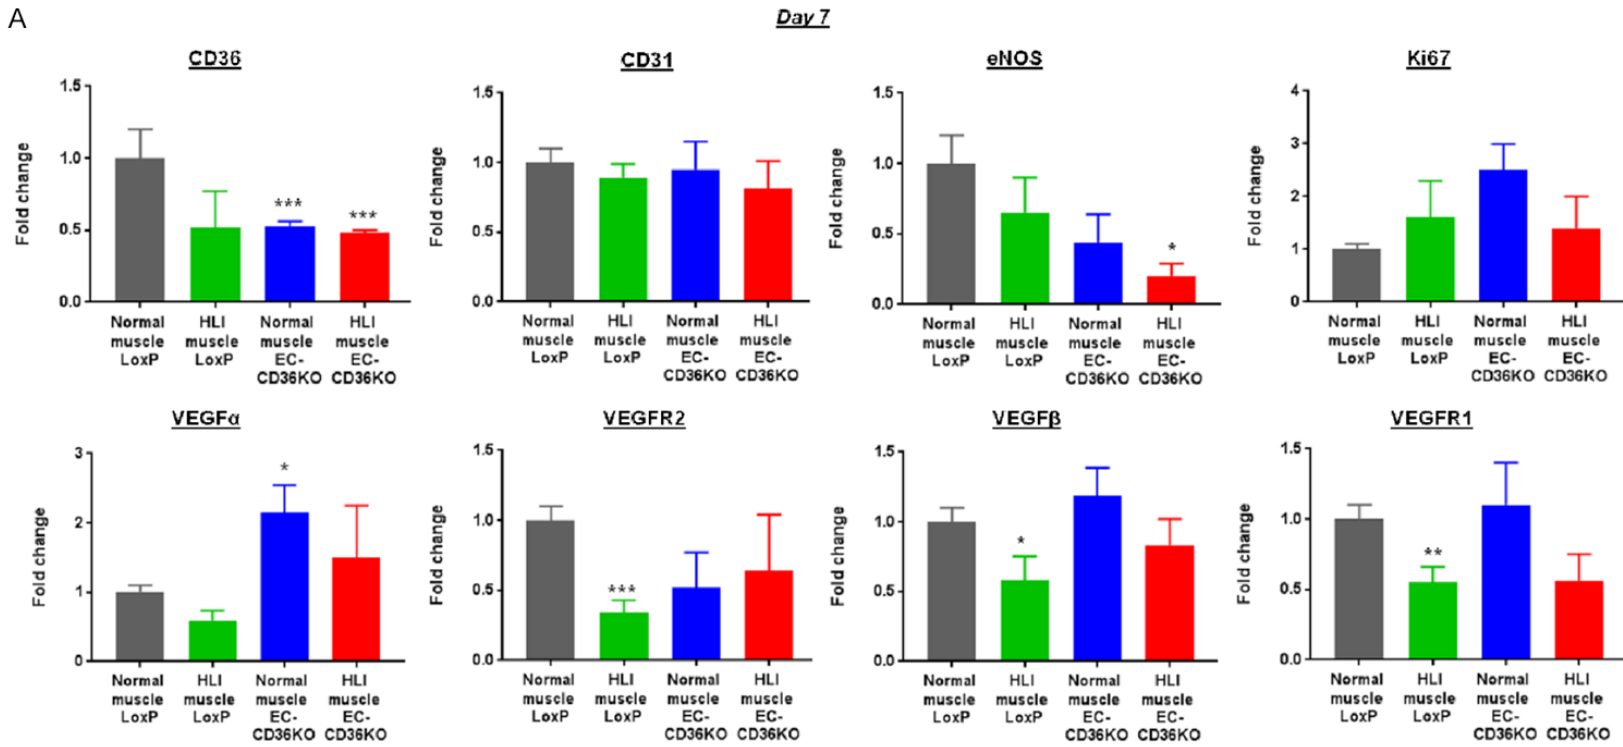

B

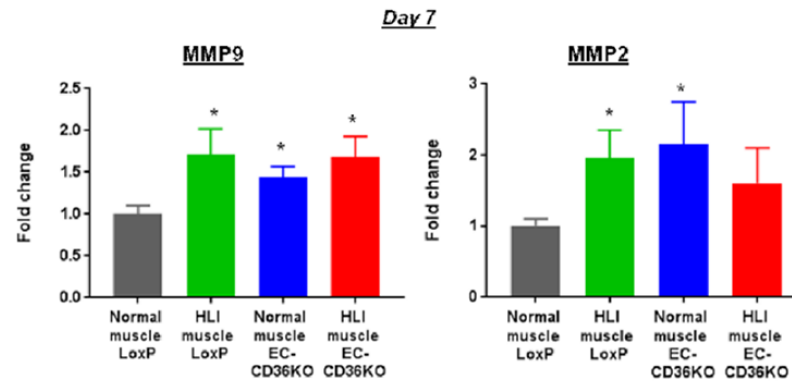

Effect of CD36 on vascular repair

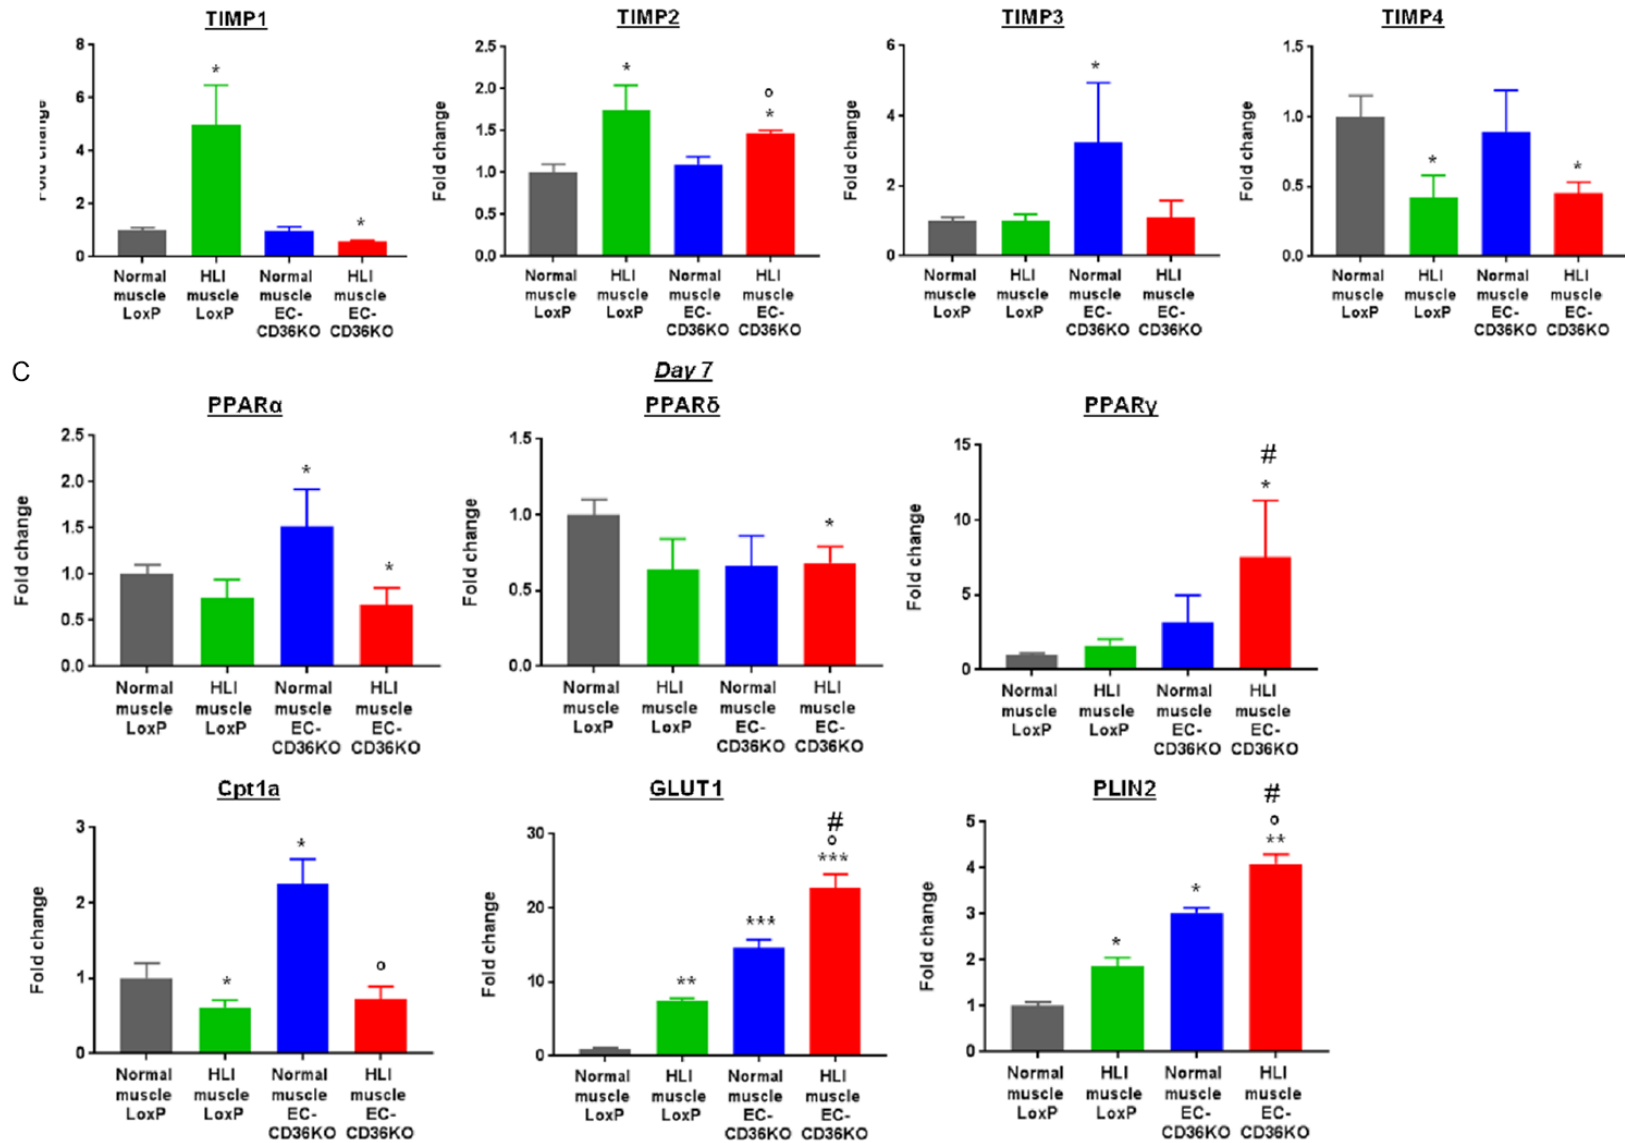

## Effect of CD36 on vascular repair

**Supplementary Figure 4.** Effect of EC-CD36 knockout in HLI mouse muscle tissues on endothelial, vascular and metabolic gene expression at 7 days post-HLI. *In vivo* hindlimb ischemia (HLI) mouse tissue mRNA expression in normal and HLI muscle tissues of LoxP and EC-CD36KO mice of (A) day 7 post-ischemia mRNA expression of CD36, CD31, eNOS, Ki67, VEGF $\alpha$ , VEGFR2, VEGF $\beta$ , and VEGFR1. Histograms represent fold changes in mRNA expression normalized to RPS3 mRNA expression. Data represent mean  $\pm$  SEM, n=8, \*p < 0.05, \*\*p < 0.01, \*\*\*p < 0.001 vs. normal muscle LoxP; (B) day 7 post-ischemia mRNA expression of MMP9, MMP2, TIMP1, TIMP2, TIMP3, and TIMP4. Histograms represent fold changes in mRNA expression normalized to RPS3 mRNA expression. Data represent mean  $\pm$  SEM, n=8, \*p < 0.05, \*\*p < 0.01 vs. normal muscle LoxP, °p < 0.01 vs. normal muscle EC-CD36KO; (C) day 7 post-ischemia mRNA expression of Cpt1a, GLUT1, and PLIN2. Histograms represent fold changes in mRNA expression normalized to RPS3 mRNA expression. Data represent mean  $\pm$  SEM, n=8, \*p < 0.05, \*\*p < 0.01 vs. normal muscle LoxP, °p < 0.01 vs. normal muscle EC-CD36 KO, #p < 0.01 vs. HLI muscle LoxP. Two-way ANOVA statistical tests were used to determine statistical significance.
